# Supplementary material
Source: HighWire-hosted journal article supplement (http://jmg.bmjjournals.com/highwire/filestream/160448/field_highwire_adjunct_files/2/jmg.2009.066027supp_tables.pdf)
Supplement: jmg.2009.066027supp_tables.pdf [file jmg.2009.066027supp_tables.pdf]

## SUPPLEMENTARY MATERIAL

Table S1. MLPA probe set P179 (*GLI3*, *HOXD13* and *ROR2* probes)

| Length (nt) | <i>GLI3</i> exon | Ligation site NM_000168.2 |      | Sequence at Ligation site |
|-------------|------------------|---------------------------|------|---------------------------|
| 391         | exon 1           | 40                        | 41   | GAGCTGAAGT-AATGAGAAGA     |
| 136         | exon 1           | 135                       | 136  | CACTCGAACA-GATGTGAGCG     |
| 409         | exon 2           | 201                       | 202  | TGGACAGACT-TATCACAGAG     |
| 160         | exon 2           | 263                       | 264  | GGCTCAGCAA-AGTCAGTGAG     |
| 427         | exon 3           | 422                       | 421  | TGAGGAGGGT-CTGAAAAGAA     |
| 190         | exon 3           | 463                       | 464  | CCTGTACCAA-TTGATGCCAG     |
| 196         | exon 4           | 575                       | 576  | TGCCCTTCAT-TAGGATCTCC     |
| 211         | exon 5           | 762                       | 763  | CCCAGCAGAA-TACTATCATC     |
| 229         | exon 6           | 1018                      | 1019 | ACGATTCTCA-ATAATTCCCG     |
| 247         | exon 7           | 1213                      | 1214 | GCCCCAACTT-TTCCAACACA     |
| 265         | exon 8           | 1363                      | 1364 | AGGTCCAAGA-TCAAACCCGA     |
| 283         | exon 9           | 1438                      | 1439 | ACCCTTGTC-AGGAGGAAGG      |
| 301         | exon 10          | 1617                      | 1618 | GGACTGCTCA-AGAGAGCAGA     |
| 319         | exon 11          | 1818                      | 1819 | GGCTTTCTCA-AATGCCTCTG     |
| 337         | exon 12          | 2035                      | 2036 | AGCCATTAC-AGTCCAGGTC      |
| 355         | exon 13          | 2190                      | 2191 | TCAGTCTTCA-TGCAGCAGCC     |
| 373         | exon 14          | 3355                      | 3356 | CAGTATTAA-ATTCCCAGAA      |

| Length (nt) | <i>HOXD13</i> exon | Ligation site NM_000523.2 |     | Sequence at Ligation site |
|-------------|--------------------|---------------------------|-----|---------------------------|
| 148         | exon 1             | 664                       | 665 | GTATCCTTCT-ACCAGGGCTA     |
| 172         | exon 2             | 978                       | 979 | GTATGCCATT-AACAAATTCA     |

| Length (nt) | <i>ROR2</i> exon | Ligation site NM_004560.2 |      | Sequence at Ligation site |
|-------------|------------------|---------------------------|------|---------------------------|
| 142         | exon 1           | 74                        | 75   | GGTCCTCGAA-GTGGACCCGT     |
| 436         | exon 1           | 295                       | 296  | CCGGACTTCA-GGTAGGATCT     |
| 166         | exon 2           | 330                       | 331  | ACGACCCTTT-AGGACCCCTT     |
| 220         | exon 4           | 684                       | 685  | GCCCAAATCA-TAACTTTCAG     |
| 256         | exon 5           | 772                       | 773  | CCGGACCATT-TATGTGGACT     |
| 292         | exon 6           | 872                       | 873  | CAGTGCTCAC-AGTTCGCCAT     |
| 328         | exon 7           | 1169                      | 1170 | GGCATGGATT-ACAGAGGAAC     |
| 364         | exon 8           | 1415                      | 1416 | GGGATTCTGT-ACATCTTGGT     |
| 400         | exon 9           | 1854                      | 1855 | TGAGCATGAT-CTTCAGCTAC     |

Table S2. MLPA probe set P180 (*SALL1*, *SALL4* and *TBX5* probes)

| Length (nt) | <i>SALL1</i> exon | Ligation site NM_002968 | Sequence at Ligation site |
|-------------|-------------------|-------------------------|---------------------------|
| 228         | exon 1            | 33 34                   | GCCTCAACAT-TTCCAATCCG     |
| 220         | exon 2            | 805 806                 | ACATCTTCTA-GTCCTTCTCA     |
| 290         | exon 3            | 3872 3873               | CAGAGCCCAA-TGCTCCCCTG     |

| Length (nt) | <i>SALL4</i> exon | Ligation site NM_020436 | Sequence at Ligation site |
|-------------|-------------------|-------------------------|---------------------------|
| 142         | exon 1            | 47 48                   | CGGCTCTCCC-GGCGCCCCGA     |
| 190         | exon 2            | 2129 2130               | GATGATGTCA-TCGAAAGCAT     |
| 256         | exon 3            | 2806 2807               | AGGCAACTTA-AAGGTGGGTT     |
| 326         | exon 4            | 2923 2924               | CTCAGAAATC-TTCCCAAGG      |

| Length (nt) | <i>TBX5</i> exon | Ligation site NM_000192    | Sequence at Ligation site |
|-------------|------------------|----------------------------|---------------------------|
| 166         | exon 1a          | 509 510                    | CGTTGGAAGA-AGACCTGGCC     |
| 318         | exon 1b          | 341 342<br>in<br>NM_181486 | ATTCTGGGTA-AGCAGTAAAC     |
| 184         | exon 2           | 726 727                    | CTGACGCAAA-AGACCTGCCC     |
| 196         | exon 3           | 837 838                    | TCAAAGTGTT-TCTCCATGAA     |
| 211         | exon 4           | 958 959                    | TAATCCCAAA-ACGAAGTACA     |
| 346         | exon 5           | 1138 1139                  | CTTCCAGAAA-CTCAAGCTCA     |
| 247         | exon 6           | 1213 1214                  | CCAGCCTAGA-TTACACATCG     |
| 148         | exon 7           | 1340 1341                  | ATCACGCAAT-TAAAGATTGA     |
| 265         | exon 7           | 1421 1422                  | AGAATGCAAA-GGTAGGAAAG     |
| 160         | exon 8           | 1465 1466                  | GAGGCAAAAA-GTGGCCTCCA     |
| 283         | exon 8           | 1640 1641                  | ATTGTACCAA-GAGGAAAGGT     |
| 172         | exon 9           | 1714 1715                  | GAAGATTCCT-TCTACCGCTC     |
| 303         | exon 9           | 2869 2870                  | TGCTTTGGTT-TTGTCTGCC      |

Table S3. Non-synonymous variants not considered to be pathogenic

| Gene                      | Number of Patients | Nucleotide Change         | Amino Acid Change | dbSNP       | SIFT score <sup>1</sup> | Notes                                                             |
|---------------------------|--------------------|---------------------------|-------------------|-------------|-------------------------|-------------------------------------------------------------------|
| <i>ENI</i>                | 1                  | 770A>T                    | N257I             | ss120037533 | 0.18                    | Patient had symbrachydactyly                                      |
| <i>GLI3</i>               | 1                  | 299C>T                    | P100L             | ss120037498 | 1.00                    |                                                                   |
|                           | 1                  | 314G>A                    | R114K             | ss120037499 | -                       | Patient from family linked to other genomic region                |
|                           | 1                  | 1393G>C                   | G465R             | rs35488756  | -                       |                                                                   |
|                           | 1                  | 2119C>T                   | P707S             | ss120037500 | -                       | Patient has <i>ZRS</i> triplication. Present in unaffected father |
|                           | 2                  | 2424A>G                   | I808M             | rs62622373  | 0.23                    | One patient has a mutation in <i>ZRS</i> of <i>SHH</i>            |
|                           | 6                  | 2993C>T                   | P998L             | rs929387    | -                       |                                                                   |
|                           | 14                 | 3083G>T<br>and<br>3084C>T | S1038I            | ss120037501 | -                       | Two patients have mutations in <i>HOXD13</i>                      |
|                           | 5                  | 4007G>A                   | G1336E            | rs35280470  | -                       |                                                                   |
|                           | 2                  | 4609C>T                   | R1537C            | rs35364414  | -                       |                                                                   |
|                           | <i>HAND2</i>       | 2                         | 283C>G            | P95A        | ss120037538             | -                                                                 |
| 1                         |                    | 594G>C                    | K198N             | ss120037539 | -                       | Present in unaffected mother                                      |
| <i>SALL1</i> <sup>3</sup> | 1                  | 44A>C                     | D15A              | ss120037520 | 0.05                    |                                                                   |
|                           | 1                  | 90G>C                     | K30N              | ss120037521 | 0.336                   |                                                                   |
|                           | 1                  | 292A>G                    | M98V              | rs28643388  | -                       |                                                                   |
|                           | 1                  | 1322C>A                   | T441N             | ss120037522 | -                       | Present in unaffected mother                                      |
|                           | 2                  | 1878G>C                   | E626D             | ss120037523 | 0.08                    | Patients had contrasting phenotypes                               |
|                           | 1                  | 1991C>T                   | P664L             | ss120037524 | -                       | Present in                                                        |

|              |   |         |        |             |      |                                                                                                     |
|--------------|---|---------|--------|-------------|------|-----------------------------------------------------------------------------------------------------|
|              | 2 | 2827A>G | S943G  | ss120037525 | 0.03 | unaffected mother<br>Patients had different phenotypes. Murine Sall1 has Gly at equivalent position |
|              | 1 | 3823G>A | V1275I | rs4614723   | -    |                                                                                                     |
|              | 1 | 3872A>G | N1291S | ss120037526 |      | Present in 4/141 normal controls                                                                    |
| <i>SALL4</i> | 9 | 2392A>C | I798L  | rs6091375   | -    |                                                                                                     |
|              | 1 | 3103G>A | G1035S | ss120037543 | 0.81 |                                                                                                     |
| <i>SPRY4</i> | 1 | 64G>A   | A32T   | ss120037549 | -    | Present in unaffected mother                                                                        |
|              | 1 | 530A>G  | K177R  | ss120037550 | 0.72 |                                                                                                     |
| <i>TBX5</i>  | 2 | 331G>T  | D111Y  | ss120037552 | 0.00 | Patients had contrasting phenotypes. Not present in affected father                                 |
|              | 1 | 1114T>A | S372T  | ss120037553 | 0.48 |                                                                                                     |

1. SIFT (Sorting Intolerant From Tolerant; <http://blocks.fhcrc.org/sift/SIFT.html>) attempts to predict whether an amino acid substitution affects protein function. Positions with normalised probabilities <0.05 are predicted to be deleterious, those  $\geq 0.05$  are predicted to be tolerated.
2. Previously described as a mutation causing GCPS (Wild A *et al.* Hum Mol Genet 1997; 6:1979-84)
3. In addition, we found all 7 allele lengths between 7 and 13 serines for the polyserine tract in exon 2 of *SALL1* (S150 to S158).

## **Tables S4-S6 Synonymous and non-coding variants not considered to be pathogenic**

The tables note the number of patients carrying the variant, and whether any of these patients have a separate confirmed pathogenic mutation described elsewhere. Also noted is the presence or absence of the variant in dbSNP version 126 ([www.ncbi.nih.gov/SNP](http://www.ncbi.nih.gov/SNP)). In cases where the variant was not present in any patient with a convincing pathogenic mutation, and is not a known SNP, then 60 bp of wild type and variant sequence, as well as the native splice site closest to the variant, were entered into the neural network splice site prediction program ([http://www.fruitfly.org/seq\\_tools/splice](http://www.fruitfly.org/seq_tools/splice)) in order to assess whether the variant might cause aberrant splicing and therefore be pathogenic. Scores range from 0 to 1, with a higher score being more likely to produce a splice site.

Table S4. Presumed non-pathogenic variants in *GLI3*

| Variant     | No of patients affected<br>(number with other identified pathogenic mutation) | dbSNP number | Neural network splice site prediction score |         |                                                  |
|-------------|-------------------------------------------------------------------------------|--------------|---------------------------------------------|---------|--------------------------------------------------|
|             |                                                                               |              | Wild type                                   | Variant | Nearest native splice site (change with variant) |
| 1-56G>A     | 1                                                                             | ss120037502  | <0.05                                       | <0.05   | 0.96 (0)                                         |
| 124+61C>A   | 3                                                                             | rs2286291    | -                                           | -       | -                                                |
| 124+76G>A   | 1                                                                             | ss120037503  | <0.05                                       | <0.05   | 0.99 (0)                                         |
| 231A>G      | 1 (1)                                                                         | ss120037504  | -                                           | -       | -                                                |
| 368-19G>A   | 3 (1)                                                                         | ss120037505  | <0.05                                       | <0.05   | 0.96 (+0.01)                                     |
| 368-7T>G    | 1                                                                             | ss120037506  | <0.05                                       | <0.05   | 0.96 (-0.14)                                     |
| 473+22A>G   | 1                                                                             | ss120037507  | <0.05                                       | <0.05   | 0.97 (0)                                         |
| 473+37C>T   | 1 (1)                                                                         | ss120037508  | -                                           | -       | -                                                |
| 474-4C>T    | 1                                                                             | ss120037509  | <0.05                                       | <0.05   | 0.96 (0)                                         |
| 827-75G>A   | 1                                                                             | ss120037510  | 0.94                                        | 0.95    | 0.69 (0)                                         |
| 840C>G      | 1                                                                             | ss120037511  | 0.51                                        | 0.23    | 0.69 (+0.05)                                     |
| 900C>T      | 6                                                                             | rs35961850   | -                                           | -       | -                                                |
| 1029-7C>T   | 1                                                                             | ss120037512  | <0.05                                       | <0.05   | 0.74 (+0.10)                                     |
| 1242+8G>A   | 1                                                                             | ss120037513  | <0.05                                       | <0.05   | 0.91 (+0.02)                                     |
| 1242+113C>G | 1                                                                             | ss120037514  | <0.05                                       | <0.05   | 0.91 (0)                                         |
| 1243-40A>C  | 1                                                                             | ss120037515  | <0.05                                       | <0.05   | <0.05                                            |
| 1356+11G>C  | 8 (1)                                                                         | rs846273     | -                                           | -       | -                                                |
| 1356+64C>A  | 5 (1)                                                                         | ss120037516  | -                                           | -       | -                                                |
| 1498-44G>A  | 8 (1)                                                                         | rs17707162   | -                                           | -       | -                                                |
| 1509C>T     | 8 (1)                                                                         | rs34020684   | -                                           | -       | -                                                |
| 2373G>A     | 1                                                                             | rs61754622   | <0.05                                       | <0.05   | 0.99 (0)                                         |
| 2826G>C     | 7                                                                             | rs34245321   | -                                           | -       | -                                                |
| 2835G>C     | 4 (1)                                                                         | rs61758978   | -                                           | -       | -                                                |
| 3774C>G     | 3                                                                             | rs35448119   | -                                           | -       | -                                                |
| 4020C>T     | 7 (1)                                                                         | rs35139358   | -                                           | -       | -                                                |
| 4071C>T     | 9 (1)                                                                         | rs34089404   | -                                           | -       | -                                                |
| 4560G>T     | 1                                                                             | ss120037517  | <0.05                                       | <0.05   | 0.98 (0)                                         |
| 4740+33G>T  | 9 (1)                                                                         | ss120037518  | -                                           | -       | -                                                |
| 4740+139T>A | 9 (1)                                                                         | ss120037519  | -                                           | -       | -                                                |

Table S5. Presumed non-pathogenic variants in *SALL1* and *SALL4*

| Gene         | Variant    | No of patients affected<br>(number with other identified pathogenic mutation) | dbSNP number | Neural network splice site prediction score |        |                                                  |
|--------------|------------|-------------------------------------------------------------------------------|--------------|---------------------------------------------|--------|--------------------------------------------------|
|              |            |                                                                               |              | Wild type                                   | Mutant | Nearest native splice site (change with variant) |
| <i>SALL1</i> | 390G>A     | 3                                                                             | ss120037527  | <0.05                                       | <0.05  | 0.26 (0)                                         |
|              | 567C>G     | 1                                                                             | ss120037528  | <0.05                                       | <0.05  | 0.26 (0)                                         |
|              | 609C>G     | 1                                                                             | ss120037529  | <0.05                                       | <0.05  | 0.26 (0)                                         |
|              | 1200G>A    | 1                                                                             | ss120037530  | <0.05                                       | 0.14   | 0.26 (0)                                         |
|              | 2310C>T    | 2                                                                             | ss120037531  | 0.30                                        | 0.44   | 0.26 (0)                                         |
|              | 2343G>C    | 2                                                                             | rs60270998   | <0.05                                       | <0.05  | 0.71 (0)                                         |
|              | 2544A>G    | 5 (2)                                                                         | rs45459896   | -                                           | -      | -                                                |
|              | 2574C>T    | 7 (1)                                                                         | rs56627294   | -                                           | -      | -                                                |
|              | 3456C>T    | 4 heterozygous,<br>1 homozygous                                               | rs11645288   | -                                           | -      | -                                                |
|              | 3534+40C>G | 1                                                                             | rs7184489    | -                                           | -      | -                                                |
|              | 3534+76C>T | 2                                                                             | ss120037532  | <0.05                                       | <0.05  | 0.71 (0)                                         |
| <i>SALL4</i> | 1-41delG   | 1                                                                             | ss120037543  | <0.05                                       | <0.05  | 0.60(0)                                          |
|              | 408T>C     | 1                                                                             | ss120037545  | <0.05                                       | <0.05  | 0.98(0)                                          |
|              | 540T>C     | 1                                                                             | rs6013281    | -                                           | -      | -                                                |
|              | 645C>G     | 13 (1)                                                                        | rs61737139   | -                                           | -      | -                                                |
|              | 1056G>A    | 69 (2)                                                                        | rs13038893   | -                                           | -      | -                                                |
|              | 1113C>G    | 1                                                                             | ss120037546  | <0.05                                       | <0.05  | 0.98(0)                                          |
|              | 1557C>T    | 1                                                                             | ss120037547  | 0.72                                        | 0.57   | 0.98 (0)                                         |
|              | 1860A>G    | 69 (3)                                                                        | rs6021437    | -                                           | -      | -                                                |
|              | 2037C>T    | 10 (1)                                                                        | rs13043248   | -                                           | -      | -                                                |
|              | 2493A>G    | 1                                                                             | ss120037548  | <0.05                                       | <0.05  | 0.96(0)                                          |
|              | 2640G>C    | 36                                                                            | rs17802735   | -                                           | -      | -                                                |

Table S6. Presumed non-pathogenic variants in *EN1*, *HAND2*, *ZRS* of *SHH*, *SPRY4*, *TBX5* and *WNT7A*

| Gene                     | Variant             | No of patients affected<br>(number with other identified pathogenic mutation) | dbSNP number | Neural network splice site prediction score |         |                                                  |
|--------------------------|---------------------|-------------------------------------------------------------------------------|--------------|---------------------------------------------|---------|--------------------------------------------------|
|                          |                     |                                                                               |              | Wild type                                   | Mutant  | Nearest native splice site (change with variant) |
| <i>EN1</i>               | 489G>A              | 16 (2)                                                                        | ss120037534  | -                                           | -       | -                                                |
|                          | 621G>C              | 2                                                                             | ss120037535  | <0.05                                       | <0.05   | 0.99(0)                                          |
|                          | 863-28delC          | 3                                                                             | ss120037537  | <0.05                                       | <0.05   | 0.94(0)                                          |
|                          | 1029C>T             | 2                                                                             | ss120037536  | <0.05                                       | 0.06    | 0.94(0)                                          |
| <i>HAND2</i>             | 565T>C              | 8                                                                             | ss120037540  | <0.05                                       | <0.05   | 0.98(0)                                          |
|                          | 621G>A              | 1                                                                             | ss120037541  | <0.05                                       | <0.05   | 0.98(0)                                          |
|                          | 654+51G>T           | 5                                                                             | ss120037542  | <0.05                                       | <0.05   | 0.98(0)                                          |
| <i>ZRS</i> of <i>SHH</i> | -56T>C              | 2                                                                             | ss120037563  | -                                           | -       | -                                                |
|                          | -46A>C              | 2                                                                             | ss120037564  | -                                           | -       | -                                                |
|                          | 3C>G <sup>1</sup>   | 84 (2)                                                                        | ss120037565  | -                                           | -       | -                                                |
|                          | 507C>G <sup>1</sup> | 2                                                                             | ss120037566  | -                                           | -       | -                                                |
|                          | +68A>G              | 1                                                                             | ss120037567  | -                                           | -       | -                                                |
| <i>SPRY4</i>             | 537C>T              | 1                                                                             | ss120037551  | <0.05                                       | 0.06    | 0.75(0)                                          |
| <i>TBX5</i>              | 309C>A              | 4                                                                             | rs28730763   | -                                           | -       | -                                                |
|                          | 364-82G>A           | 1                                                                             | ss120037554  | <0.05                                       | <0.05   | 0.98(0)                                          |
|                          | 664+36G>T           | 66                                                                            | rs2236017    | -                                           | -       | -                                                |
|                          | 757-26G>T           | 1                                                                             | ss120037555  | <0.05                                       | <0.05   | 0.99(0)                                          |
| <i>WNT7A</i>             | 60C>T               | 3                                                                             | ss120037556  | <0.05                                       | <0.05   | 0.99(0)                                          |
|                          | 72-10C>T            | 1                                                                             | ss120037557  | <0.05                                       | <0.05   | 0.82<br>(+0.04)                                  |
|                          | 75C>T               | 1                                                                             | rs35103037   | -                                           | -       | -                                                |
|                          | 81C>T               | 1                                                                             | ss120037558  | 0.73                                        | 0.87    | 0.82                                             |
|                          | 213C>T              | 2                                                                             | ss120037559  | 0.14                                        | 0.17    | 0.82                                             |
|                          | 298+37C>A           | 95 (3)                                                                        | rs3749319    | -                                           | -       | -                                                |
|                          | 298+40C>T           | 1                                                                             | ss120037560  | <0.05                                       | <0.05   | 0.97(0)                                          |
|                          | 315G>A              | 48                                                                            | rs12639607   | -                                           | -       | -                                                |
|                          | 458T>C              | 50 (1)                                                                        | rs3762719    | -                                           | -       | -                                                |
|                          | 571-15C>T           | 1                                                                             | ss120037561  | <0.05                                       | <0.05   | 0.97(0)                                          |
| 681G>A                   | 1                   | ss120037562                                                                   | <0.05        | <0.05                                       | 0.97(0) |                                                  |

1. Previously reported as a SNP (Lettice, LA *et al.* Hum Mol Genet 2003;12:1725-35)
